# Supplementary material for: Influence of battery power setting on carbonyl emissions from electronic cigarettes
Source: PubMed Central journal article supplement (PMC7528267; doi:10.18332/tid/126406), 2020-09-14
Supplement: TID-18-77-s1.pdf [file TID-18-77-s1.pdf]

**Supplementary Table S1.** Parameters of the LC-MS/MS method for carbonyl determination.

|                        |                                                                                                                                                              |                                |                                 |
|------------------------|--------------------------------------------------------------------------------------------------------------------------------------------------------------|--------------------------------|---------------------------------|
| Mobile phase           | A: water<br>B: acetonitrile                                                                                                                                  |                                |                                 |
| Flow                   | 0.3 mL/min                                                                                                                                                   |                                |                                 |
| Gradient               | 0 min 55% B, 15% B; 10 min 55% B; 15 min 100% B; 18 min 100% B; 18.5 min 55% B; 25 min 55% B                                                                 |                                |                                 |
| Injection              | 5 $\mu$ L                                                                                                                                                    |                                |                                 |
| MS/MS                  | Negative ionisation mode<br>Cone: 75 V<br>Capillary: 3.5 kV<br>Desolvation temperature: 320 °C<br>MS/MS operated in selective reaction monitoring mode (SRM) |                                |                                 |
| <i>SRM parameters</i>  | <i>Transition Q1<br/>(m/z)<sup>1</sup></i>                                                                                                                   | <i>Transition Q2<br/>(m/z)</i> | <i>Collision energy<br/>(V)</i> |
| Formaldehyde-DNPH      | 209>151                                                                                                                                                      | 209>163                        | 5                               |
| Acetaldehyde-DNPH      | 223>151                                                                                                                                                      | 223>163                        | 7                               |
| Acrolein-DNPH          | 235>158                                                                                                                                                      | 235>163                        | 9                               |
| Acetone-DNPH           | 237>207                                                                                                                                                      | 237>151                        | 8                               |
| Propionaldehyde-DNPH   | 237>163                                                                                                                                                      | 237>152                        | 9                               |
| Crotonaldehyde-DNPH    | 249>172                                                                                                                                                      | 249>163                        | 10                              |
| 2-Butanone-DNPH        | 251>152                                                                                                                                                      | 251>221                        | 10                              |
| Butyraldehyde-DNPH     | 251>221                                                                                                                                                      | 251>163                        | 8                               |
| Acetaldehyde-D4-DNPH   | 227>151                                                                                                                                                      | 227>163                        | 7                               |
| Acetone-D6-DNPH        | 243>213                                                                                                                                                      | 243>151                        | 8                               |
| Cyclopentanone-D4-DNPH | 267>237                                                                                                                                                      | 267>219                        | 12                              |

<sup>1</sup>Transition Q1 was used for the quantification of the compounds.

**Supplementary Figure S1.** Relative composition of carbonyl emissions generated by A) device A with 0.25  $\Omega$  coil (recommended 30-70 W), B) device A with 0.5  $\Omega$  coil (recommended 15-30 W), C) device B with 0.15  $\Omega$  coil (recommended 30-70 W) and D) device B with 0.5  $\Omega$  coil (recommended 15-40 W).

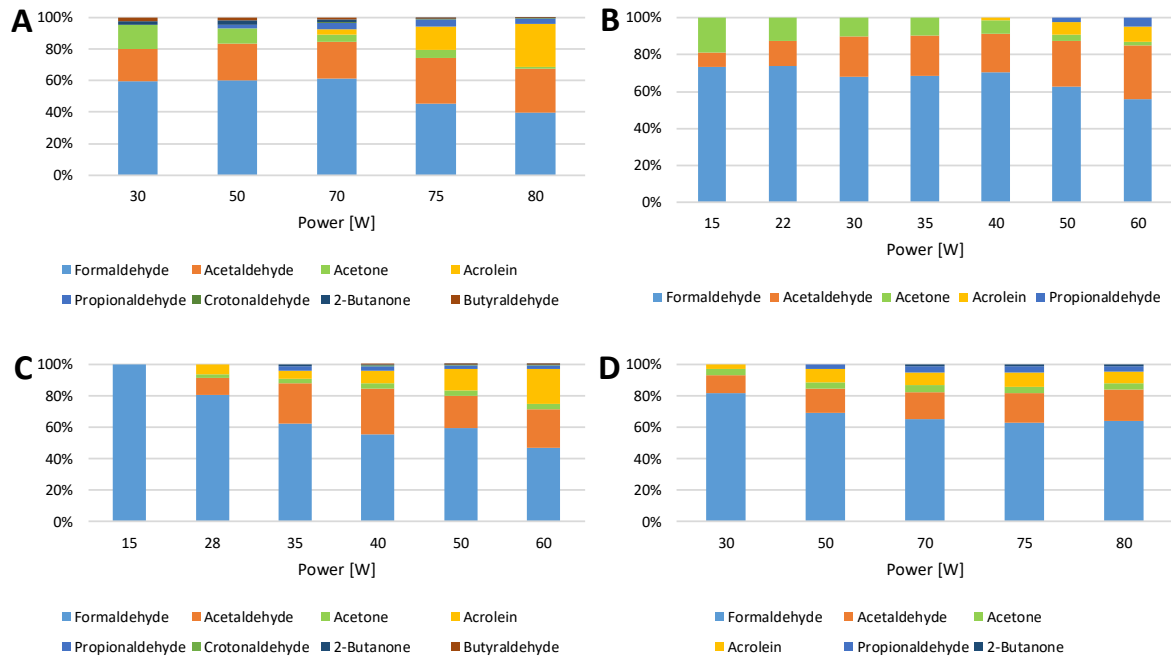

© 2020 Zelinkova Z. and Wenzl T.
